# Supplementary material for: Experimental and theoretical insights into Co–Ln magnetic exchange and the rare slow-magnetic relaxation behavior of [CoII2Pr]2+ in a series of linear [CoII2Ln]2+ complexes
Source: Royal Society of Chemistry journal article supplement (doi:10.1039/d1dt03573h), 2022-01-01
Supplement: d1dt03573h1.pdf [file d1dt03573h1.pdf]

## Supporting Information

### Experimental and Theoretical Insights into The Co-Ln Magnetic Exchange and The Rare Slow-Magnetic Relaxation Behavior of $[\text{Co}^{\text{II}}_2\text{Pr}]^{2+}$ in a Series of Linear $[\text{Co}^{\text{II}}_2\text{Ln}]^{2+}$ Complexes

Naushad Ahmed<sup>\*a b ‡</sup> and Kamal Uddin Ansari<sup>a ‡</sup>

<sup>a</sup> Department of Chemistry, Indian Institute of Technology Bombay, Powai, Mumbai-400076, Maharashtra, India. Email: [naushad.chem@gmail.com](mailto:naushad.chem@gmail.com)

<sup>b</sup> Department of Chemistry, Indian Institute of Technology Hyderabad, Kandi, Telangana, 502285, India. Email: [cy21pdf15@iith.ac.in](mailto:cy21pdf15@iith.ac.in)

<sup>‡</sup> Authors contributed equally

**Table S1.** Crystallographic parameters for complexes **1-3**

| Complex                                     | 1                                                                | 2                                                                   | 3                                                                |
|---------------------------------------------|------------------------------------------------------------------|---------------------------------------------------------------------|------------------------------------------------------------------|
| Formula                                     | $\text{Co}_2\text{LaC}_{60}\text{H}_{56}\text{N}_7\text{O}_{21}$ | $\text{Co}_2\text{CeC}_{60}\text{H}_{56}\text{N}_7\text{O}_{23.25}$ | $\text{Co}_2\text{PrC}_{60}\text{H}_{56}\text{N}_7\text{O}_{21}$ |
| Size [mm]                                   | 0.15 x 0.11 x 0.08                                               | 0.21 x 0.13 x 0.02                                                  | 0.20 x 0.20 x 0.20                                               |
| System                                      | Triclinic                                                        | Triclinic                                                           | Triclinic                                                        |
| Space group                                 | <i>P</i> -1                                                      | <i>P</i> -1                                                         | <i>P</i> -1                                                      |
| <i>a</i> [Å]                                | 12.704(2)                                                        | 12.691(3)                                                           | 12.746(3)                                                        |
| <i>b</i> [Å]                                | 13.2508(19)                                                      | 13.200(3)                                                           | 13.250(3)                                                        |
| <i>c</i> [Å]                                | 21.871(4)                                                        | 21.832(5)                                                           | 21.758(6)                                                        |
| $\alpha$ [°]                                | 85.942(7)                                                        | 86.095(10)                                                          | 92.052(11)                                                       |
| $\beta$ [°]                                 | 87.626(7)                                                        | 87.771(9)                                                           | 92.012(1)                                                        |
| $\gamma$ [°]                                | 61.386(4)                                                        | 61.324(5)                                                           | 118.729(16)                                                      |
| <i>V</i> [Å <sup>3</sup> ]                  | 3223.8(9)                                                        | 3201.2(13)                                                          | 3214.5(15)                                                       |
| <i>Z</i>                                    | 2                                                                | 2                                                                   | 2                                                                |
| $\rho_{\text{calcd}}$ [g/cm <sup>-3</sup> ] | 1.565                                                            | 1.593                                                               | 1.572                                                            |
| $2\theta_{\text{max}}$                      | 58.38                                                            | 58.3                                                                | 58.28                                                            |
| radiation                                   | Mo $K_{\alpha}$                                                  | Mo $K_{\alpha}$                                                     | Mo $K_{\alpha}$                                                  |
| $\lambda$ [Å]                               | 0.71070                                                          | 0.71070                                                             | 0.71070                                                          |
| <i>T</i> [K]                                | 100                                                              | 100                                                                 | 100                                                              |
| reflns                                      | 50130                                                            | 43736                                                               | 55892                                                            |
| Ind. reflns                                 | 17267                                                            | 17092                                                               | 17178                                                            |
| reflns with $I > 2\sigma(I)$                | 15459                                                            | 14301                                                               | 15342                                                            |
| <i>R</i> 1                                  | 0.0473                                                           | 0.0617                                                              | 0.0571                                                           |
| <i>wR</i> 2                                 | 0.1034                                                           | 0.1590                                                              | 0.1205                                                           |

**Table S2.** Continuous Shape Measurement (CShM) for Co<sup>II</sup> sites in **1-3**

| Metal Site | HP-6   | PPY-6  | OC-6         | TPR-6        | JPPY-6 |
|------------|--------|--------|--------------|--------------|--------|
| Complex 1  |        |        |              |              |        |
| Co1        | 33.345 | 19.840 | <b>3.383</b> | <b>6.049</b> | 23.669 |
| Co2        | 32.880 | 19.712 | <b>3.896</b> | <b>5.587</b> | 23.407 |
| Complex 2  |        |        |              |              |        |
| Co1        | 33.288 | 19.748 | <b>3.435</b> | <b>5.995</b> | 23.561 |
| Co2        | 32.946 | 19.559 | <b>3.990</b> | <b>5.468</b> | 23.457 |
| Complex 3  |        |        |              |              |        |
| Co1        | 33.024 | 19.500 | <b>4.104</b> | <b>5.395</b> | 23.383 |
| Co2        | 33.150 | 19.657 | <b>3.461</b> | <b>6.038</b> | 23.452 |

\* HP-6 = Hexagonal planar ( $D_{6h}$ ), PPY-6 = Pentagonal pyramid ( $C_{5v}$ ), OC-6 Octahedron ( $O_h$ ), TPR-6 = Trigonal prism ( $D_{3h}$ ), JPPY-6 = Johnson pentagonal pyramid J2 ( $C_{5v}$ )

**Table S3.** Selected bond lengths, bond angles, dihedral angles, and interatomic distances in complexes **1-3**.

| <b>Bonds</b>                       | <b>1</b>  | <b>2</b>   | <b>3</b>   |
|------------------------------------|-----------|------------|------------|
| <b>Bond Distance (Å)</b>           |           |            |            |
| Co1-N11                            | 2.054(3)  | 2.082(4)   | 2.048(4)   |
| Co1-O11                            | 2.049(2)  | 2.043(3)   | 2.046(3)   |
| Co1-O13                            | 2.187(3)  | 2.236(3)   | 2.189(3)   |
| Co1-N31                            | 2.084(3)  | 2.055(4)   | 2.082(4)   |
| Co1-O31                            | 2.043(3)  | 2.055(3)   | 2.048(3)   |
| Co1-O33                            | 2.229(3)  | 2.188(3)   | 2.250(3)   |
| Co2-N51                            | 2.097(3)  | 2.095(4)   | 2.046(4)   |
| Co2-O51                            | 2.018(3)  | 2.024(3)   | 2.066(3)   |
| Co2-O53                            | 2.186(3)  | 2.187(3)   | 2.231(3)   |
| Co2-N71                            | 2.046(3)  | 2.043(4)   | 2.100(4)   |
| Co2-O71                            | 2.065(2)  | 2.072(3)   | 2.023(3)   |
| Co2-O73                            | 2.218(3)  | 2.220(3)   | 2.191(3)   |
| Ln1-O11                            | 2.054(3)  | 2.417(3)   | 2.564(3)   |
| Ln1-O12                            | 2.590(3)  | 2.695(3)   | 2.680(3)   |
| Ln1-O31                            | 2.695(3)  | 2.567(3)   | 2.392(3)   |
| Ln1-O32                            | 2.439(2)  | 2.692(3)   | 2.676(3)   |
| Ln1-O51                            | 2.717(3)  | 2.420(3)   | 2.515(3)   |
| Ln1-O52                            | 2.443(2)  | 2.667(3)   | 2.640(3)   |
| Ln1-O71                            | 2.679(3)  | 2.527(3)   | 2.401(3)   |
| Ln1-O72                            | 2.552(3)  | 2.654(3)   | 2.649(3)   |
| Ln1-O92                            | 2.572(3)  | 2.552(3)   | 2.534(4)   |
| Ln1-O93                            | 2.585(3)  | 2.559(3)   | 2.555(3)   |
| <b>Bond Angle (°)</b>              |           |            |            |
| Co1-O11-Ln                         | 105.17(9) | 111.04(12) | 105.49(18) |
| Co1-O31-Ln                         | 110.92(9) | 105.11(11) | 111.82(19) |
| Co2-O51-Ln                         | 112.27(9) | 112.03(13) | 106.90(12) |
| Co2-O71-Ln                         | 106.56(9) | 106.43(12) | 112.73(19) |
| <b>Dihedral Angle (°)</b>          |           |            |            |
| Co1-O11-Ln1-O31                    | 13.03     | 12.75      | 12.31      |
| Co2-O51-Ln1-O71                    | 11.47     | 11.60      | 11.49      |
| <b>Interplaner twist Angle (°)</b> |           |            |            |

|         |                                     |           |           |
|---------|-------------------------------------|-----------|-----------|
|         | 29.51                               | 29.36     | 31.53     |
|         | <b>Intermetallic separation (Å)</b> |           |           |
| Co1-Ln1 | 3.699(4)                            | 3.683(6)  | 3.689(10) |
| Co2-Ln1 | 3.771(4)                            | 3.692(6)  | 3.682(10) |
| Co1-Co2 | 7.388(8)                            | 7.353(12) | 7.348(20) |

**Table S4.** The average Bailar twist angle (°) for Co(II) sites in complexes **1-6**.

| Metal site | Co <sub>2</sub> La ( <b>1</b> ) | Co <sub>2</sub> Ce ( <b>2</b> ) | Co <sub>2</sub> Pr ( <b>3</b> ) | Co <sub>2</sub> Gd ( <b>4</b> ) | Co <sub>2</sub> Tb ( <b>5</b> ) | Co <sub>2</sub> Dy ( <b>6</b> ) |
|------------|---------------------------------|---------------------------------|---------------------------------|---------------------------------|---------------------------------|---------------------------------|
| Co1        | 32.82                           | 33.74                           | 30.86                           | 33.36                           | 32.12                           | 32.02                           |
| Co2        | 33.31                           | 32.99                           | 31.15                           | 35.45                           | 33.40                           | 29.52                           |

**Table S5.** The Continuous Shape Measurement (CSHM) for Ln<sup>III</sup> site in **1-3**

| Metal Site      | JBCCU-10 | JBCSAPR-10   | JMBIC-10 | JATDI-10 | JSPC-10      | SDD-10 | TD-10 | HD-10  |
|-----------------|----------|--------------|----------|----------|--------------|--------|-------|--------|
| La ( <b>1</b> ) | 13.911   | <b>4.270</b> | 8.428    | 16.762   | <b>3.022</b> | 5.217  | 4.443 | 11.213 |
| Ce ( <b>2</b> ) | 13.822   | <b>4.238</b> | 8.517    | 16.823   | <b>3.032</b> | 5.221  | 4.428 | 11.275 |
| Pr ( <b>3</b> ) | 13.669   | <b>4.123</b> | 8.503    | 16.851   | <b>3.004</b> | 5.263  | 4.449 | 11.183 |

\* JBCCU-10 = Bicapped cube J15 ( $D_{4h}$ ), JBCSAPR-10 = Bicapped square antiprism J17 ( $D_{4d}$ ), JMBIC-10 = Metabidiminished icosahedron J62 ( $C_{2v}$ ), JATDI-10 = Augmented tridiminished icosahedron J64 ( $C_{3v}$ ), JSPC-10 = Sphenocorona J87 ( $C_{2v}$ ), SDD-10 = Staggered Dodecahedron (2:6:2) ( $D_2$ ), TD-10 = Tetradecahedron (2:6:2) ( $C_{2v}$ ), HD-10 = Hexadecahedron (2:6:2) or (1:4:4:1) ( $D_{4h}$ )

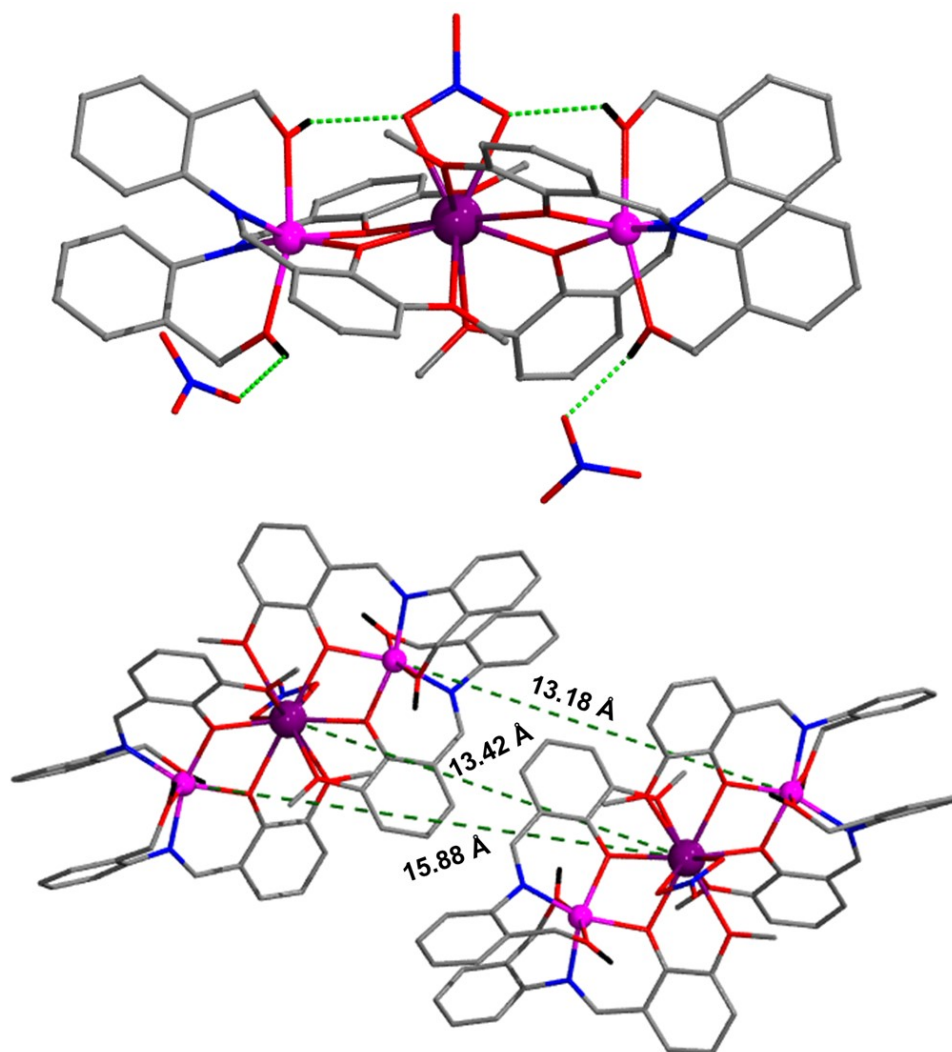

**Figure S1.** Hydrogen bonding (top) and intermolecular metallic separation (bottom) present in complex **3**.

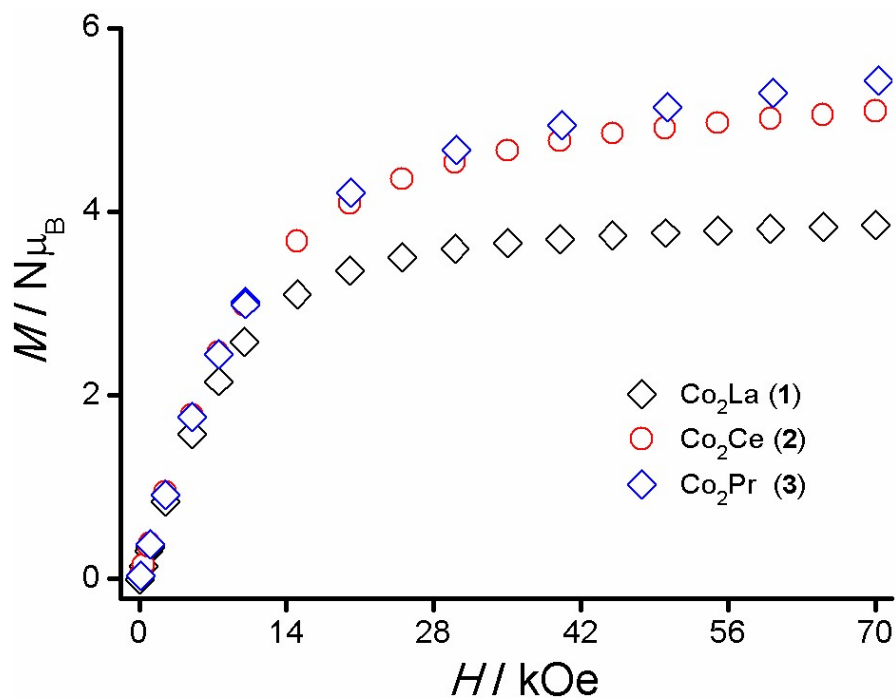

Figure S2. Magnetization plot for complexes 1-3 at 2 K.

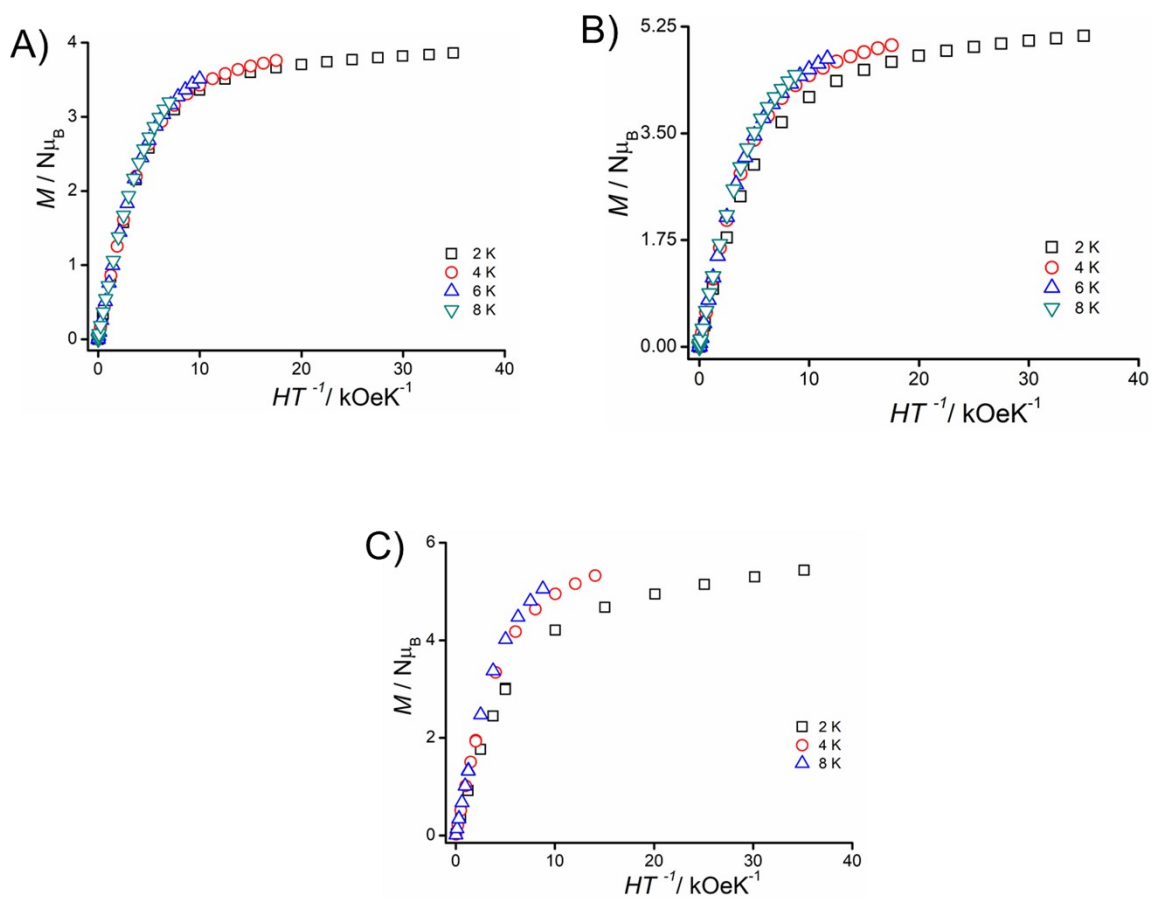

Figure S3. Reduced Magnetization plots for complexes 1-3 at the indicated temperatures.

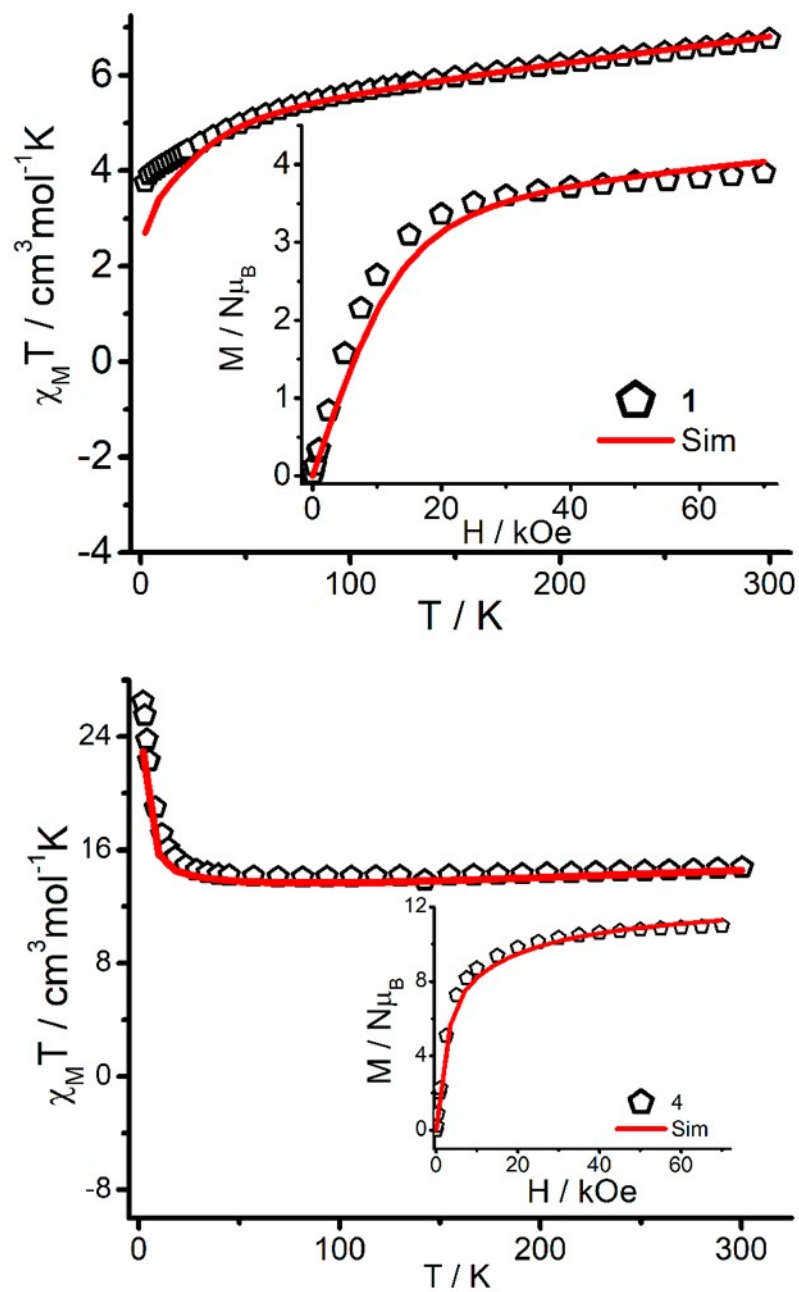

**Figure S4.** Simulation of dc magnetic data using PHI program for complex **1** (top) and complex **4** (bottom) to extract the SH parameters. Solid lines represent the simulated data.

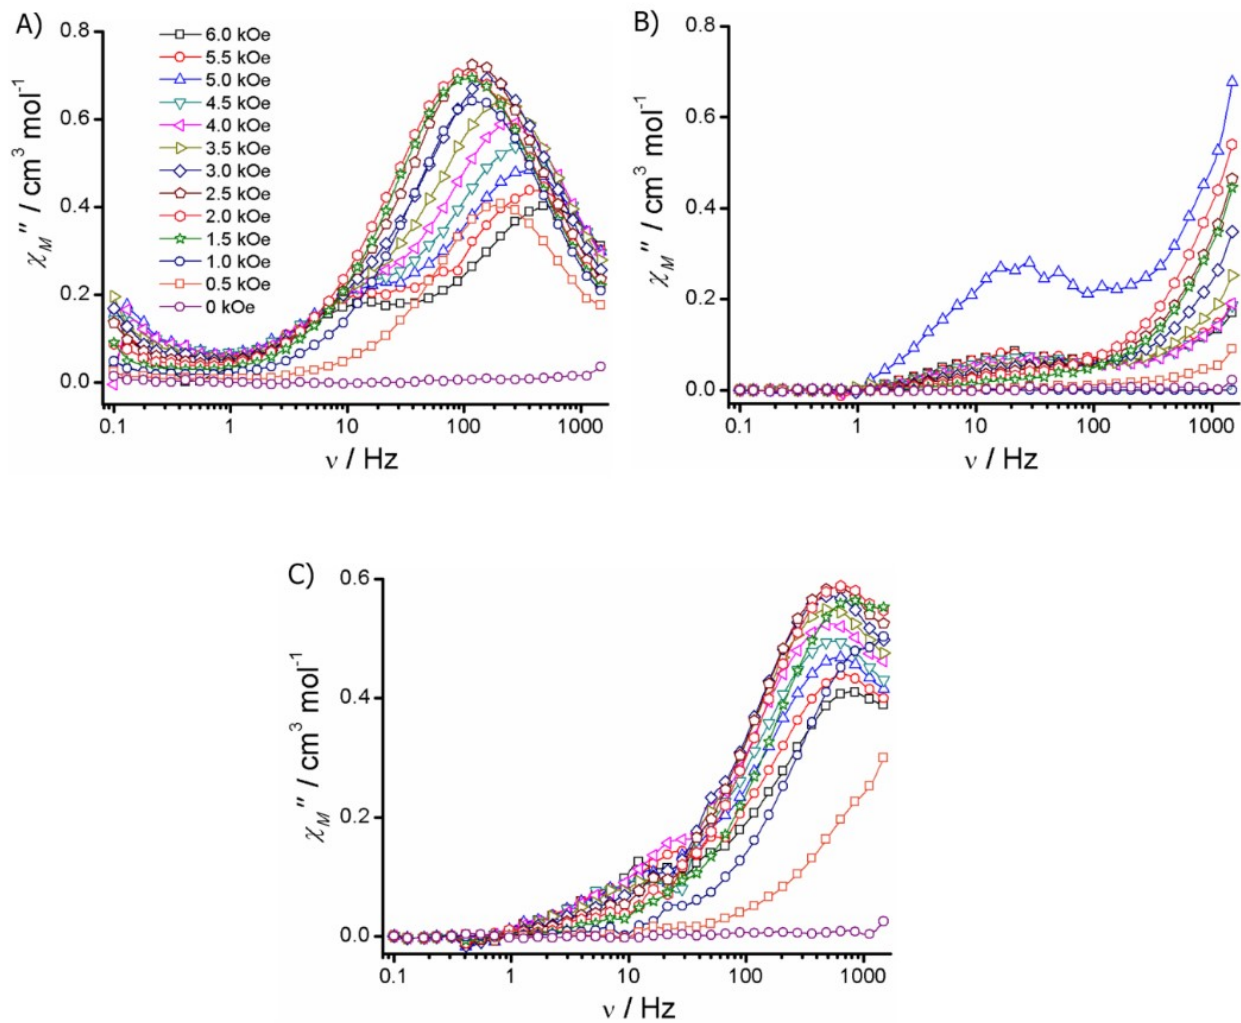

**Figure S5.** Field dependent ac susceptibility measurement (A) for complex **1**, (B) for **2** and (C) for **3** respectively in the presence of external dc magnetic field 0-6 kOe at 1.8 K.



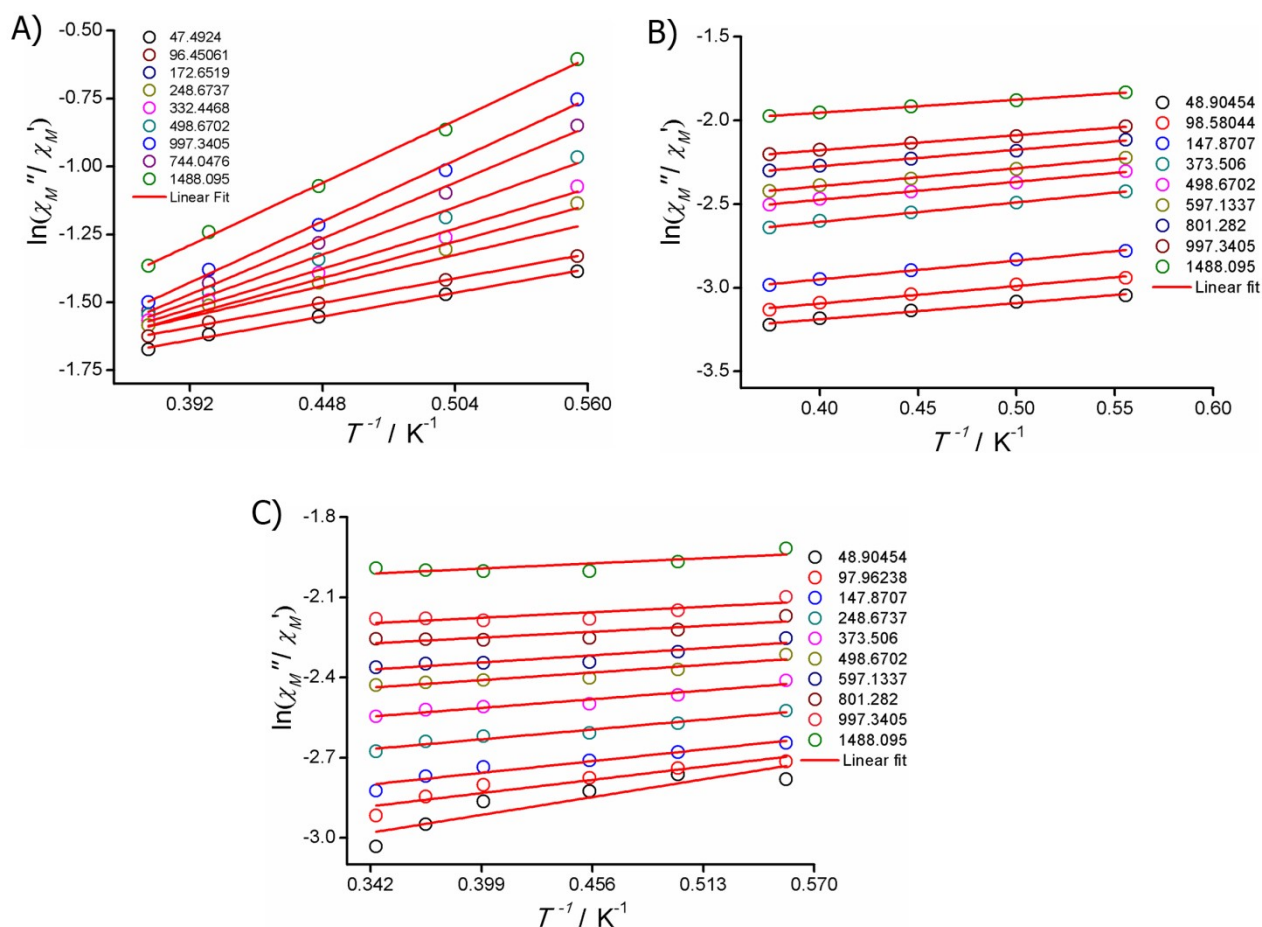

**Figure S6.** Ac data fit (A-C) using equation  $\ln(\chi''/\chi') = \ln(\omega\tau_0) + E_a/k_B T$  to extract the energy barrier for complexes **4-6** respectively.

## Computational Details

### CASSCF/SO-RASSI/SINGLE\_ANISO calculations

During the CASSCF based *ab initio* calculations using MOLCAS 8.0 suit, we have considered the single paramagnetic metal ion at a time by replacing the rest of the centers Co(II) and Ln(III) by their diamagnetic analogue Zn(II) and La(III) respectively. We have taken the active metal fragment Co(II)-La(III)-Zn(II) and Zn(II)-La(III)-Co(II) for Co1 and Co2 ions respectively. The metal fragment Zn(II)-Ln(III)-Zn(II) (where Ln(III) = Ce, Pr, Gd, Tb and Dy) was used to compute the individual lanthanide(III) metal ion for all the complexes **2-6** containing paramagnetic Ln(III) centers. The Spin Hamiltonian (SH) parameters were computed using *ab initio* method. We have employed the basis set [ANO-RCC...3s2p], [ANO-RCC...2s], [ANO-RCC...3s2p1d] for C, H and N or O respectively. The basis sets [ANO-RCC...5s4p2d] and [ANO-RCC...8s7p5d3f2g1h] have been employed for divalent transition and trivalent lanthanide metal ions respectively. The complete active space self-consistent method (CASSCF) was performed to achieve energies of the spin-free

states. The CASSCF were performed by considering the 7 electrons across the five 3d orbitals of Co(II) in all the complexes **1-6**. In case of lanthanide metal ions we have considered the 1 electron across the seven 4f orbitals of Ce (for complex **2**) and 2, 7, 8 and 9 electrons across the seven 4f orbitals of Pr, Gd, Tb and Dy in complexes **3-6** respectively. In the configuration integration procedure for the calculation of roots we computed 10 quartet and 40 doublet excited states for cobalt(II) ions and for lanthanide ions 7 singlet for Ce(III), 21 triplet and 28 singlet for Pr(III), 1 octet, 48 sextet for Gd(III), 7 septet, 140 quintet and 195 triplet excited states for Tb(III) and 21 excited sextet excited states roots for Dy(III) respectively were computed to investigate the anisotropy. The computed 10 quartet and 40 doublet spin states for each Co(II) ion were further mixed by the spin-orbit coupling within the Restricted Active Space State Interaction (RASSI) step to get energies of spin-orbit states for Co1 and Co2 metal fragments in each of the complex. For the lanthanide metal center, due to the hardware limitation only limited number of CASSCF states were mixed by spin orbit coupling in RASSI-SO step. In order to compute the g-tensors and magnetic properties we have performed the SINGLE\_ANISO step in which the *ab initio* computed matrix elements of angular momentum and spin-orbit multiplets were used.

**POLY\_ANISO Simulations:** Simulation of dc susceptibility data for complexes **1-6** was done using POLY\_ANISO program implemented in MOLCAS 8.0 program. During simulation we have considered the SINGLE\_ANISO computed wave functions for each paramagnetic metal ion. To generate the low lying exchange state we have taken the ground and first excited state energy level (spin-orbit state) for each Co(II) and Ln(III) in all the cases except complex **4** for which all the eight spin-orbit states are taken.

**BS-DFT Calculation:** We have used B3LYP functional with all-electron Alhrich's triple- $\zeta$  valence (TZV) <sup>1, 2</sup> basis sets implemented in Gaussian 09 program <sup>3</sup> for all the elements. We have estimated the  $J$  value from the energy difference of high-spin and broken symmetry states following equation  $J = E_{BS} - E_{HS}/S(S + 1)$ , where  $S$  is the total spin ground state,  $E_{HS}$  is the energy of high-spin state and  $E_{BS}$  is the energy of broken symmetry state respectively.

**Table S6.** The CASSCF computed g-tensors along with the axial and transverse magnetic anisotropies for Co(II) ion in complexes **1-6**.

|                  | $g_x$     | $g_y$    | $g_z$     | D / cm <sup>-1</sup> | E / cm <sup>-1</sup> | E/D   |
|------------------|-----------|----------|-----------|----------------------|----------------------|-------|
| <b>Complex 1</b> |           |          |           |                      |                      |       |
| Co1              | 1.8706879 | 2.09459  | 3.2229492 | -108.823             | 13.722               | 0.126 |
| Co2              | 1.9099073 | 2.140170 | 3.1918984 | -104.508             | 12.439               | 0.119 |
| <b>Complex 2</b> |           |          |           |                      |                      |       |
| Co1              | 1.8698972 | 2.094142 | 3.2242057 | -109.3225            | 13.574               | 0.124 |
| Co2              | 1.9194293 | 2.145748 | 3.1883677 | -103.5894            | 12.016               | 0.115 |
| <b>Complex 3</b> |           |          |           |                      |                      |       |
| Co1              | 1.8962470 | 2.123592 | 3.2022004 | -105.630             | 13.158               | 0.124 |
| Co2              | 1.9099929 | 2.137717 | 3.1943319 | -105.793             | 11.980               | 0.113 |
| <b>Complex 4</b> |           |          |           |                      |                      |       |
| Co1              | 1.593473  | 2.135621 | 3.4360036 | -122.624             | 11.455               | 0.093 |
| Co2              | 1.7591667 | 2.276640 | 3.2817568 | -107.950             | 15.117               | 0.140 |
| <b>Complex 5</b> |           |          |           |                      |                      |       |
| Co1              | 1.8874935 | 2.111067 | 3.2334645 | -110.3753            | 11.323               | 0.102 |
| Co2              | 1.8883271 | 2.112788 | 3.2151164 | -107.5369            | 12.456               | 0.115 |
| <b>Complex 6</b> |           |          |           |                      |                      |       |
| Co1              | 1.8793162 | 2.097995 | 3.2533810 | -110.456             | 11.699               | 0.105 |
| Co2              | 1.8857695 | 2.098968 | 3.2207568 | -110.464             | 11.697               | 0.105 |

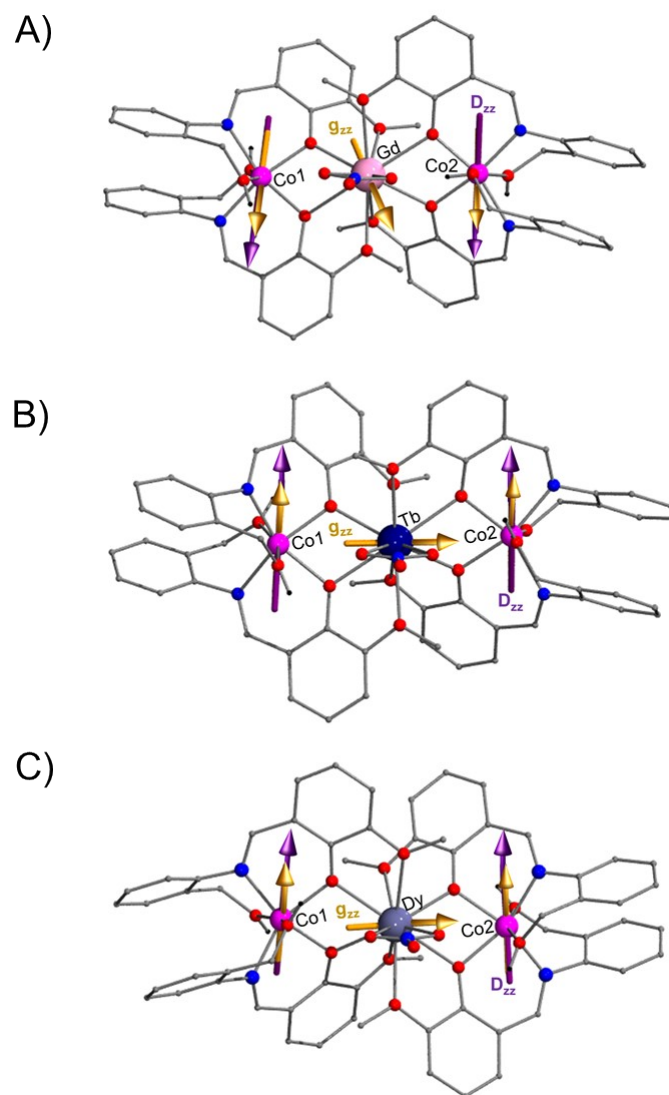

**Figure S7.** The orientation of main magnetization axes  $g_{zz}$  (yellow arrow) on each metal ion in complexes **4-6** (A-C). The local magnetic anisotropy  $D_{zz}$  on each Co(II) centre. shown in purple arrow.

**Table S6.** Energy / $\text{cm}^{-1}$  (shown in bold) of the low lying doublets and  $g$ -tensors on individual magnetic centers in complexes **1-6**.

| Multiplets       | 1              | 2              | 3               | 4               | 5               | 6               | 7               | 8               |
|------------------|----------------|----------------|-----------------|-----------------|-----------------|-----------------|-----------------|-----------------|
| <b>Complex 1</b> |                |                |                 |                 |                 |                 |                 |                 |
| <b>Co1</b>       | <b>0.000</b>   | <b>222.778</b> | <b>636.141</b>  | <b>943.127</b>  | <b>2649.686</b> | <b>2749.038</b> | <b>5633.475</b> | <b>5729.712</b> |
|                  | $g_x = 0.7558$ | $g_x = 4.2122$ | $g_x = 3.5415$  | $g_x = 0.2369$  | $g_x = 0.5711$  | $g_x = 4.1317$  | $g_x = 0.2591$  | $g_x = 3.6249$  |
|                  | $g_y = 0.8818$ | $g_y = 3.6003$ | $g_y = 2.8192$  | $g_y = -0.2947$ | $g_y = 0.6908$  | $g_y = 3.2081$  | $g_y = 0.2891$  | $g_y = 3.1685$  |
|                  | $g_z = 9.0551$ | $g_z = 2.5780$ | $g_z = 0.25103$ | $g_z = 3.0399$  | $g_z = 6.8468$  | $g_z = 2.2260$  | $g_z = 6.4595$  | $g_z = 2.1426$  |
|                  | <b>0.000</b>   | <b>213.412</b> | <b>693.026</b>  | <b>988.307</b>  | <b>2815.170</b> | <b>2915.659</b> | <b>5855.137</b> | <b>5950.701</b> |

|                  |                                                                                   |                                                                                      |                                                                                      |                                                                                     |                                                                                       |                                                                                        |                                                                                        |                                                                                        |
|------------------|-----------------------------------------------------------------------------------|--------------------------------------------------------------------------------------|--------------------------------------------------------------------------------------|-------------------------------------------------------------------------------------|---------------------------------------------------------------------------------------|----------------------------------------------------------------------------------------|----------------------------------------------------------------------------------------|----------------------------------------------------------------------------------------|
| <b>Co2</b>       | $g_x = 0.70193$<br>$g_y = 0.8277$<br>$g_z = 9.0675$                               | $g_x = 4.0296$<br>$g_y = 3.8922$<br>$g_z = 2.9488$                                   | $g_x = 3.7361$<br>$g_y = 3.2880$<br>$g_z = 0.0555$                                   | $g_x = 0.1327$<br>$g_y = 0.1793$<br>$g_z = 3.0119$                                  | $g_x = 0.6188$<br>$g_y = 0.7580$<br>$g_z = 6.9182$                                    | $g_x = 2.2367$<br>$g_y = 3.1922$<br>$g_z = 4.2305$                                     | $g_x = 0.2921$<br>$g_y = 0.3243$<br>$g_z = 6.4776$                                     | $g_x = 3.6815$<br>$g_y = 3.1584$<br>$g_z = 2.1463$                                     |
| <b>Complex 2</b> |                                                                                   |                                                                                      |                                                                                      |                                                                                     |                                                                                       |                                                                                        |                                                                                        |                                                                                        |
| <b>Co1</b>       | <b>0.000</b><br>$g_x = 0.7439$<br>$g_y = 0.8686$<br>$g_z = 9.0620$                | <b>223.644</b><br>$g_x = 4.2215$<br>$g_y = 3.5889$<br>$g_z = 2.5850$                 | <b>638.133</b><br>$g_x = 3.5205$<br>$g_y = 2.8325$<br>$g_z = 0.2561$                 | <b>945.961</b><br>$g_x = 0.2222$<br>$g_y = 0.2801$<br>$g_z = 3.0346$                | <b>2664.566</b><br>$g_x = 0.6041$<br>$g_y = 0.7402$<br>$g_z = 6.8565$                 | <b>2764.808</b><br>$g_x = 2.2208$<br>$g_y = 3.1720$<br>$g_z = 4.1644$                  | <b>5630.657</b><br>$g_x = 0.2705$<br>$g_y = 0.3029$<br>$g_z = 6.4647$                  | <b>5727.575</b><br>$g_x = 3.6304$<br>$g_y = 3.15329$<br>$g_z = 2.1432$                 |
| <b>Ce</b>        | <b>0.000</b><br>$g_x = 0.12096$<br>$g_y = 0.18604$<br>$g_z = 4.04830$             | <b>341.867</b><br>$g_x = 1.0017$<br>$g_y = 1.3273$<br>$g_z = 3.3897$                 | <b>570.571</b><br>$g_x = 0.1564$<br>$g_y = 0.9460$<br>$g_z = 3.5204$                 | <b>2324.326</b><br>$g_x = 0.54962$<br>$g_y = 0.6126$<br>$g_z = 7.4403$              | <b>2585.06</b><br>$g_x = 3.0366$<br>$g_y = 2.6983$<br>$g_z = 0.1346$                  | <b>2800.379</b><br>$g_x = 0.6663$<br>$g_y = 1.0518$<br>$g_z = 6.7557$                  | <b>3351.106</b><br>$g_x = 1.8783$<br>$g_y = 3.0401$<br>$g_z = 5.4688$                  | -----                                                                                  |
| <b>Co2</b>       | <b>0.000</b><br>$g_x = 0.68321$<br>$g_y = 0.80572$<br>$g_z = 9.08193$             | <b>211.319</b><br>$g_x = 4.01525$<br>$g_y = 3.9270$<br>$g_z = 3.02295$               | <b>709.243</b><br>$g_x = 3.7810$<br>$g_y = 3.3838$<br>$g_z = 0.0157$                 | <b>1001.769</b><br>$g_x = 0.1152$<br>$g_y = 0.1599$<br>$g_z = 2.9994$               | <b>2865.111</b><br>$g_x = 0.6515$<br>$g_y = 0.8077$<br>$g_z = 6.9335$                 | <b>2966.171</b><br>$g_x = 2.2327$<br>$g_y = 3.1628$<br>$g_z = 4.2735$                  | <b>5886.665</b><br>$g_x = 0.3012$<br>$g_y = 0.3347$<br>$g_z = 6.4835$                  | <b>5982.548</b><br>$g_x = 3.69241$<br>$g_y = 3.15056$<br>$g_z = 2.14760$               |
| <b>Complex 3</b> |                                                                                   |                                                                                      |                                                                                      |                                                                                     |                                                                                       |                                                                                        |                                                                                        |                                                                                        |
| <b>Co1</b>       | <b>0.000</b><br>$g_x = 0.7403$<br>$g_y = 0.8726$<br>$g_z = 9.0506$                | <b>216.122</b><br>$g_x = 4.0861$<br>$g_y = 3.8079$<br>$g_z = 2.7843$                 | <b>663.578</b><br>$g_x = 3.7722$<br>$g_y = 3.0318$<br>$g_z = 0.1253$                 | <b>963.366</b><br>$g_x = 0.2392$<br>$g_y = 0.2981$<br>$g_z = 3.0443$                | <b>2692.182</b><br>$g_x = 0.6639$<br>$g_y = 0.8319$<br>$g_z = 6.8413$                 | <b>2793.262</b><br>$g_x = 2.1998$<br>$g_y = 3.0988$<br>$g_z = 4.2133$                  | <b>5605.578</b><br>$g_x = 0.2973$<br>$g_y = 0.3372$<br>$g_z = 6.4497$                  | <b>5704.063</b><br>$g_x = 3.6348$<br>$g_y = 3.1128$<br>$g_z = 2.1353$                  |
| <b>Pr</b>        | <b>0.000 /</b><br><b>13.973</b><br>$g_x = 0.00$<br>$g_y = 0.00$<br>$g_z = 6.1259$ | <b>127.363 /</b><br><b>134.187</b><br>$g_x = 0.00$<br>$g_y = 0.00$<br>$g_z = 4.7051$ | <b>188.457 /</b><br><b>261.552</b><br>$g_x = 0.00$<br>$g_y = 0.00$<br>$g_z = 3.4526$ | <b>474.205 /</b><br><b>30.046</b><br>$g_x = 0.00$<br>$g_y = 0.00$<br>$g_z = 3.5379$ | <b>632.820 /</b><br><b>2245.123</b><br>$g_x = 0.00$<br>$g_y = 0.00$<br>$g_z = 0.1289$ | <b>2246.069 /</b><br><b>2354.609</b><br>$g_x = 0.00$<br>$g_y = 0.00$<br>$g_z = 2.7912$ | <b>2366.303 /</b><br><b>2440.288</b><br>$g_x = 0.00$<br>$g_y = 0.00$<br>$g_z = 2.3600$ | <b>2444.904 /</b><br><b>2661.451</b><br>$g_x = 0.00$<br>$g_y = 0.00$<br>$g_z = 4.9375$ |
| <b>Co2</b>       | <b>0.000</b><br>$g_x = 0.6674$<br>$g_y = 0.7873$<br>$g_z = 9.0863$                | <b>215.619</b><br>$g_x = 4.0513$<br>$g_y = 3.8664$<br>$g_z = 2.9767$                 | <b>699.781</b><br>$g_x = 3.6993$<br>$g_y = 3.3261$<br>$g_z = 0.0630$                 | <b>996.726</b><br>$g_x = 0.1014$<br>$g_y = 0.1473$<br>$g_z = 3.0021$                | <b>2888.743</b><br>$g_x = 0.7071$<br>$g_y = 0.8937$<br>$g_z = 6.9454$                 | <b>2991.259</b><br>$g_x = 2.2209$<br>$g_y = 3.1015$<br>$g_z = 4.3254$                  | <b>5812.216</b><br>$g_x = 0.3277$<br>$g_y = 0.3697$<br>$g_z = 6.4905$                  | <b>5910.573</b><br>$g_x = 3.6905$<br>$g_y = 3.1037$<br>$g_z = 2.1466$                  |
| <b>Complex 4</b> |                                                                                   |                                                                                      |                                                                                      |                                                                                     |                                                                                       |                                                                                        |                                                                                        |                                                                                        |
| <b>Co1</b>       | <b>0.000</b><br>$g_x = 0.5129$<br>$g_y = 0.7069$<br>$g_z = 9.4230$                | <b>248.439</b><br>$g_x = 1.3028$<br>$g_y = 1.9508$<br>$g_z = 5.1578$                 | <b>574.944</b><br>$g_x = 0.7653$<br>$g_y = 1.4449$<br>$g_z = 2.3709$                 | <b>904.958</b><br>$g_x = 0.3241$<br>$g_y = 0.4756$<br>$g_z = 2.9872$                | <b>2357.486</b><br>$g_x = 0.6741$<br>$g_y = 1.0288$<br>$g_z = 7.7563$                 | <b>2551.142</b><br>$g_x = 2.7023$<br>$g_y = 2.9972$<br>$g_z =$<br>3.63464              | <b>3342.944</b><br>$g_x = 0.38102$<br>$g_y = 1.2175$<br>$g_z = 5.5778$                 | <b>3533.176</b><br>$g_x = 1.5977$<br>$g_y = 1.6160$<br>$g_z = 2.9200$                  |
| <b>Gd</b>        | <b>0.000</b><br>$g_x = 0.00162$<br>$g_y = 0.00173$<br>$g_z = 13.9919$             | <b>51.869</b><br>$g_x = 0.16679$<br>$g_y = 0.17876$<br>$g_z = 9.95149$               | <b>85.863</b><br>$g_x = 3.4501$<br>$g_y = 3.6250$<br>$g_z = 5.5553$                  | <b>105.616</b><br>$g_x = 1.5955$<br>$g_y = 4.2049$<br>$g_z = 11.2924$               | <b>40159.486</b><br>$g_x = 0.00704$<br>$g_y = 0.01753$<br>$g_z = 11.8093$             | <b>40215.601</b><br>$g_x = 1.4404$<br>$g_y = 1.6935$<br>$g_z = 7.4087$                 | <b>40255.852</b><br>$g_x = 1.86191$<br>$g_y = 2.43291$<br>$g_z = 7.89552$              | <b>40269.830</b><br>$g_x = 0.8552$<br>$g_y = 1.6585$<br>$g_z = 8.2719$                 |
|                  | <b>0.000</b>                                                                      | <b>222.161</b>                                                                       | <b>639.316</b>                                                                       | <b>939.238</b>                                                                      | <b>2316.935</b>                                                                       | <b>2488.816</b>                                                                        | <b>3447.845</b>                                                                        | <b>3619.547</b>                                                                        |

|                  |                                                                       |                                                                        |                                                                         |                                                                      |                                                                        |                                                                                  |                                                                                   |                                                                                    |
|------------------|-----------------------------------------------------------------------|------------------------------------------------------------------------|-------------------------------------------------------------------------|----------------------------------------------------------------------|------------------------------------------------------------------------|----------------------------------------------------------------------------------|-----------------------------------------------------------------------------------|------------------------------------------------------------------------------------|
| <b>Co2</b>       | $g_x = 0.7390$<br>$g_y = 1.0451$<br>$g_z = 9.1543$                    | $g_x = 4.3147$<br>$g_y = 3.5591$<br>$g_z = 2.5015$                     | $g_x = 4.0791$<br>$g_y = 2.3745$<br>$g_z = 0.3068$                      | $g_x = 0.4936$<br>$g_y = 0.6456$<br>$g_z = 3.1882$                   | $g_x = 0.7796$<br>$g_y = 1.2170$<br>$g_z = 7.3829$                     | $g_x = 2.4900$<br>$g_y = 2.7933$<br>$g_z = 3.8059$                               | $g_x = 0.4732$<br>$g_y = 1.0616$<br>$g_z = 5.8067$                                | $g_x = 1.7428$<br>$g_y = 1.8605$<br>$g_z = 3.0666$                                 |
| <b>Complex 5</b> |                                                                       |                                                                        |                                                                         |                                                                      |                                                                        |                                                                                  |                                                                                   |                                                                                    |
| <b>Co1</b>       | <b>0.000</b><br>$g_x = 0.6054$<br>$g_y = 0.7104$<br>$g_z = 9.1804$    | <b>224.20</b><br>$g_x = 4.1955$<br>$g_y = 3.6977$<br>$g_z = 2.9127$    | <b>689.431</b><br>$g_x = 3.5240$<br>$g_y = 3.2442$<br>$g_z = 0.2053$    | <b>993.181</b><br>$g_x = 0.0646$<br>$g_y = 0.1069$<br>$g_z = 2.9160$ | <b>3030.785</b><br>$g_x = 0.7916$<br>$g_y = 1.0304$<br>$g_z = 6.9609$  | <b>3134.319</b><br>$g_x = 2.1991$<br>$g_y = 3.0175$<br>$g_z = 4.4261$            | <b>5854.584</b><br>$g_x = 0.3739$<br>$g_y = 0.4309$<br>$g_z = 6.4884$             | <b>5955.116</b><br>$g_x = 3.7112$<br>$g_y = 3.0391$<br>$g_z = 2.1393$              |
| <b>Tb</b>        | <b>0.000/0.001</b><br>$g_x = 0.00$<br>$g_y = 0.000$<br>$g_z = 17.932$ | <b>180.40/180.1</b><br>$g_x = 0.00$<br>$g_y = 0.00$<br>$g_z = 14.7431$ | <b>336.1/339.1</b><br>$g_x = 0.00$<br>$g_y = 0.00$<br>$g_z = 11.51$     | <b>409.8/428.4</b><br>$g_x = 0.00$<br>$g_y = 0.00$<br>$g_z = 12.027$ | <b>465.5/482.1</b><br>$g_x = 0.00$<br>$g_y = 0.00$<br>$g_z = 5.109$    | <b>504.7 /</b><br><b>641.7</b><br>$g_x = 0.00$<br>$g_y = 0.000$<br>$g_z = 6.270$ | <b>643.7 /</b><br><b>2263.0</b><br>$g_x = 0.00$<br>$g_y = 0.000$<br>$g_z = 0.505$ | <b>2266.6 /</b><br><b>2321.9</b><br>$g_x = 0.000$<br>$g_y = 0.00$<br>$g_z = 3.131$ |
| <b>Co2</b>       | <b>0.000</b><br>$g_x = 0.68804$<br>$g_y = 0.8095$<br>$g_z = 9.0957$   | <b>219.35</b><br>$g_x = 4.14730$<br>$g_y = 3.73335$<br>$g_z = 2.7954$  | <b>665.453</b><br>$g_x = 3.67936$<br>$g_y = 3.03706$<br>$g_z = 0.17386$ | <b>967.261</b><br>$g_x = 0.1991$<br>$g_y = 0.2533$<br>$g_z = 3.0070$ | <b>2812.467</b><br>$g_x = 0.7206$<br>$g_y = 0.9215$<br>$g_z = 6.87752$ | <b>2914.325</b><br>$g_x = 2.1950$<br>$g_y = 3.0501$<br>$g_z = 4.2931$            | <b>5627.131</b><br>$g_x = 0.3363$<br>$g_y = 0.3870$<br>$g_z = 6.4485$             | <b>5727.162</b><br>$g_x = 3.6572$<br>$g_y = 3.0642$<br>$g_z = 2.1299$              |
| <b>Complex 6</b> |                                                                       |                                                                        |                                                                         |                                                                      |                                                                        |                                                                                  |                                                                                   |                                                                                    |
| <b>Co1</b>       | <b>0.000</b><br>$g_x = 0.6309$<br>$g_y = 0.7378$<br>$g_z = 9.2041$    | <b>224.600</b><br>$g_x = 4.2602$<br>$g_y = 3.6395$<br>$g_z = 2.8004$   | <b>669.699</b><br>$g_x = 3.5794$<br>$g_y = 3.0464$<br>$g_z = 0.2784$    | <b>976.154</b><br>$g_x = 0.1609$<br>$g_y = 0.2114$<br>$g_z = 2.8990$ | <b>2900.543</b><br>$g_x = 0.7492$<br>$g_y = 0.9636$<br>$g_z = 6.9345$  | <b>3004.065</b><br>$g_x = 2.2049$<br>$g_y = 3.0461$<br>$g_z = 4.3499$            | <b>5691.052</b><br>$g_x = 0.3471$<br>$g_y = 0.4010$<br>$g_z = 6.4651$             | <b>5792.687</b><br>$g_x = 3.6635$<br>$g_y = 3.0538$<br>$g_z = 2.1349$              |
| <b>Dy</b>        | <b>0.000</b><br>$g_x = 0.0021$<br>$g_y = 0.0029$<br>$g_z = 19.730$    | <b>135.660</b><br>$g_x = 0.0015$<br>$g_y = 0.0122$<br>$g_z = 17.877$   | <b>209.172</b><br>$g_x = 0.2246$<br>$g_y = 0.3401$<br>$g_z = 17.8297$   | <b>236.626</b><br>$g_x = 0.4845$<br>$g_y = 1.1504$<br>$g_z = 11.417$ | <b>350.012</b><br>$g_x = 0.0633$<br>$g_y = 1.5211$<br>$g_z = 9.5477$   | <b>442.112</b><br>$g_x = 8.0321$<br>$g_y =$<br>6.17961<br>$g_z = 3.1159$         | <b>511.404</b><br>$g_x = 1.85125$<br>$g_y = 3.9588$<br>$g_z = 9.62535$            | <b>586.325</b><br>$g_x = 0.03843$<br>$g_y = 0.73351$<br>$g_z = 15.9127$            |
| <b>Co2</b>       | <b>0.000</b><br>$g_x = 0.6326$<br>$g_y = 0.7382$<br>$g_z = 9.1204$    | <b>224.615</b><br>$g_x = 4.2039$<br>$g_y = 3.6474$<br>$g_z = 2.8018$   | <b>669.655</b><br>$g_x = 3.5747$<br>$g_y = 3.0499$<br>$g_z = 0.2104$    | <b>976.125</b><br>$g_x = 0.1600$<br>$g_y = 0.2118$<br>$g_z = 2.9908$ | <b>2900.488</b><br>$g_x = 0.7500$<br>$g_y = 0.9641$<br>$g_z = 6.9371$  | <b>3004.0</b><br>$g_x = 2.2058$<br>$g_y =$<br>3.04804<br>$g_z =$<br>4.35382      | <b>5690.869</b><br>$g_x = 0.34752$<br>$g_y = 0.40050$<br>$g_z = 6.4855$           | <b>5792.507</b><br>$g_x = 3.6675$<br>$g_y = 3.0500$<br>$g_z =$<br>2.14138          |

**Table 3.** SO-RASSI computed low lying energies ( $\text{cm}^{-1}$ ) of spin-orbit states of the individual magnetic centers in complexes **1-3**.

| Complex 1 |          | Complex 2 |         |         | Complex 3 |          |          |
|-----------|----------|-----------|---------|---------|-----------|----------|----------|
| Co1       | Co2      | Co1       | Ce      | Co2     | Co1       | Pr       | Co2      |
| 0         | 0        | 0         | 0       | 0       | 0         | 0        | 0        |
| 0         | 0        | 0         | 0       | 0       | 0         | 13.973   | 0        |
| 222.778   | 213.412  | 223.644   | 341.867 | 211.319 | 216.122   | 127.363  | 215.619  |
| 222.778   | 213.412  | 223.644   | 341.867 | 211.319 | 216.122   | 134.187  | 215.619  |
| 636.141   | 693.026  | 638.133   | 570.571 | 709.243 | 663.578   | 188.457  | 699.781  |
| 636.141   | 693.026  | 638.133   | 570.571 | 709.243 | 663.578   | 261.552  | 699.781  |
| 943.127   | 988.307  | 945.961   | 2324.32 | 1001.76 | 963.366   | 474.205  | 996.726  |
| 943.127   | 988.307  | 945.961   | 2324.32 | 1001.76 | 963.366   | 630.046  | 996.726  |
| 2649.686  | 2815.17  | 2664.56   | 2585.06 | 2865.11 | 2692.182  | 632.82   | 2888.743 |
| 2649.686  | 2815.17  | 2664.56   | 2585.06 | 2865.11 | 2692.182  | 2245.123 | 2888.743 |
| 2749.038  | 2915.659 | 2764.80   | 2800.37 | 2966.17 | 2793.262  | 2246.069 | 2991.259 |
| 2749.038  | 2915.659 | 2764.80   | 2800.37 | 2966.17 | 2793.262  | 2354.609 | 2991.259 |
| 5633.475  | 5855.137 | 5630.65   | 3351.10 | 2966.17 | 5605.578  | 2366.303 | 5812.216 |
| 5633.475  | 5855.137 | 5630.65   | 3351.10 | 2966.17 | 5605.578  | 2440.288 | 5812.216 |
| 5729.712  | 5950.701 | 5727.57   |         | 5886.66 | 5704.063  | 2444.904 | 5910.573 |
| 5729.712  | 5950.701 | 5727.57   |         | 5886.66 | 5704.063  | 2661.451 | 5910.573 |

**Table 4.** SO-RASSI computed low lying energies ( $\text{cm}^{-1}$ ) of spin-orbit states of the individual magnetic centers in complexes **4-6**.

| Complex 4 |           |          | Complex 5 |          |         | Complex 6 |        |          |
|-----------|-----------|----------|-----------|----------|---------|-----------|--------|----------|
| Co1       | Gd        | Co2      | Co1       | Tb       | Co2     | Co1       | Dy     | Co2      |
| 0         | 0         | 0        | 0         | 0        | 0       | 0         | 0      | 0        |
| 0         | 0         | 0        | 0         | 0        | 0       | 0         | 0      | 0        |
| 248.439   | 0.463     | 222.161  | 224.208   | 180.403  | 219.359 | 224.6     | 135.66 | 224.615  |
| 248.439   | 0.463     | 222.161  | 224.208   | 180.403  | 219.359 | 224.6     | 135.66 | 224.615  |
| 574.944   | 0.762     | 639.316  | 689.431   | 336.110  | 665.453 | 669.69    | 209.17 | 669.655  |
| 574.944   | 0.762     | 639.316  | 689.431   | 336.110  | 665.453 | 669.69    | 209.17 | 669.655  |
| 904.958   | 1.11      | 939.238  | 993.181   | 409.874  | 967.261 | 976.15    | 236.62 | 976.125  |
| 904.958   | 1.11      | 939.238  | 993.181   | 409.874  | 967.261 | 976.15    | 236.62 | 976.125  |
| 2357.486  | 40664.466 | 2316.935 | 3030.785  | 465.548  | 2812.46 | 2900.54   | 350.01 | 2900.488 |
| 2357.486  | 40664.466 | 2316.935 | 3030.785  | 465.548  | 2812.46 | 2900.54   | 350.01 | 2900.488 |
| 2551.142  | 40707.042 | 2488.816 | 3134.319  | 504.747  | 2914.32 | 3004.06   | 442.11 | 3004.013 |
| 2551.142  | 40707.042 | 2488.816 | 3134.319  | 504.747  | 2914.32 | 3004.06   | 442.11 | 3004.013 |
| 3342.944  | 40707.042 | 3447.845 | 5854.584  | 641.768  | 5627.13 | 5691.05   | 511.40 | 5690.869 |
| 3342.944  | 40707.042 | 3447.845 | 5854.584  | 641.768  | 5627.13 | 5691.05   | 511.40 | 5690.869 |
| 3533.176  | 40739.314 | 3619.547 | 5955.116  | 2263.084 | 5727.16 | 5792.68   | 586.32 | 5792.507 |
| 3533.176  | 40739.314 | 3619.547 | 5955.116  | 2263.084 | 5727.16 | 5792.68   | 586.32 | 5792.507 |



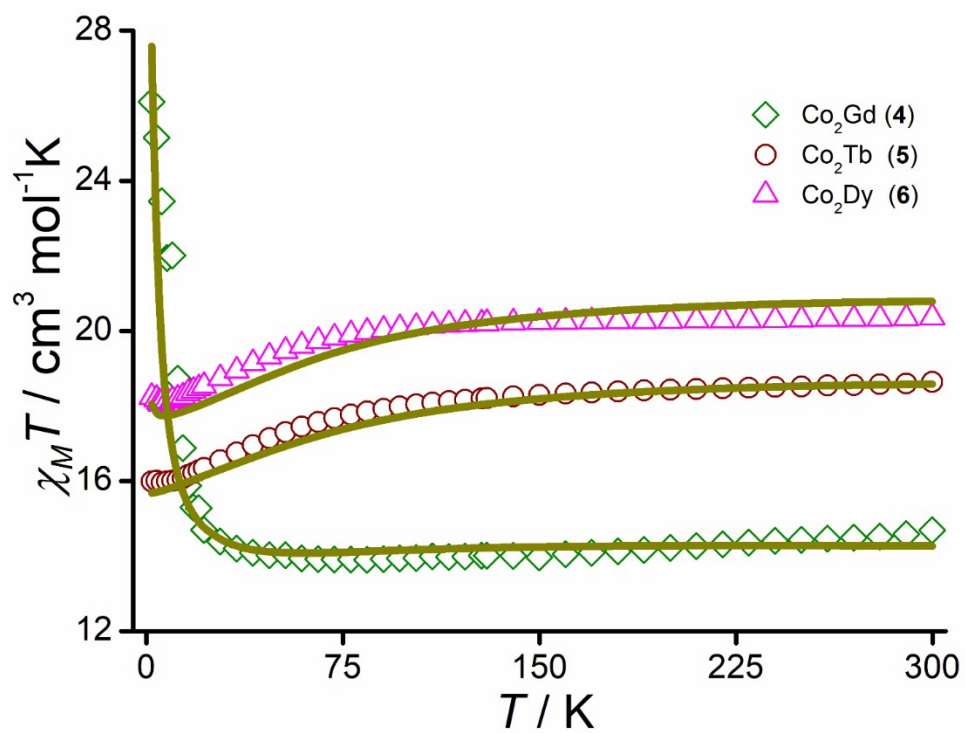

**Figure S8.** Direct current magnetic susceptibility data for complexes 4-6. Solid lines represent the POLY\_ANISO simulated data.

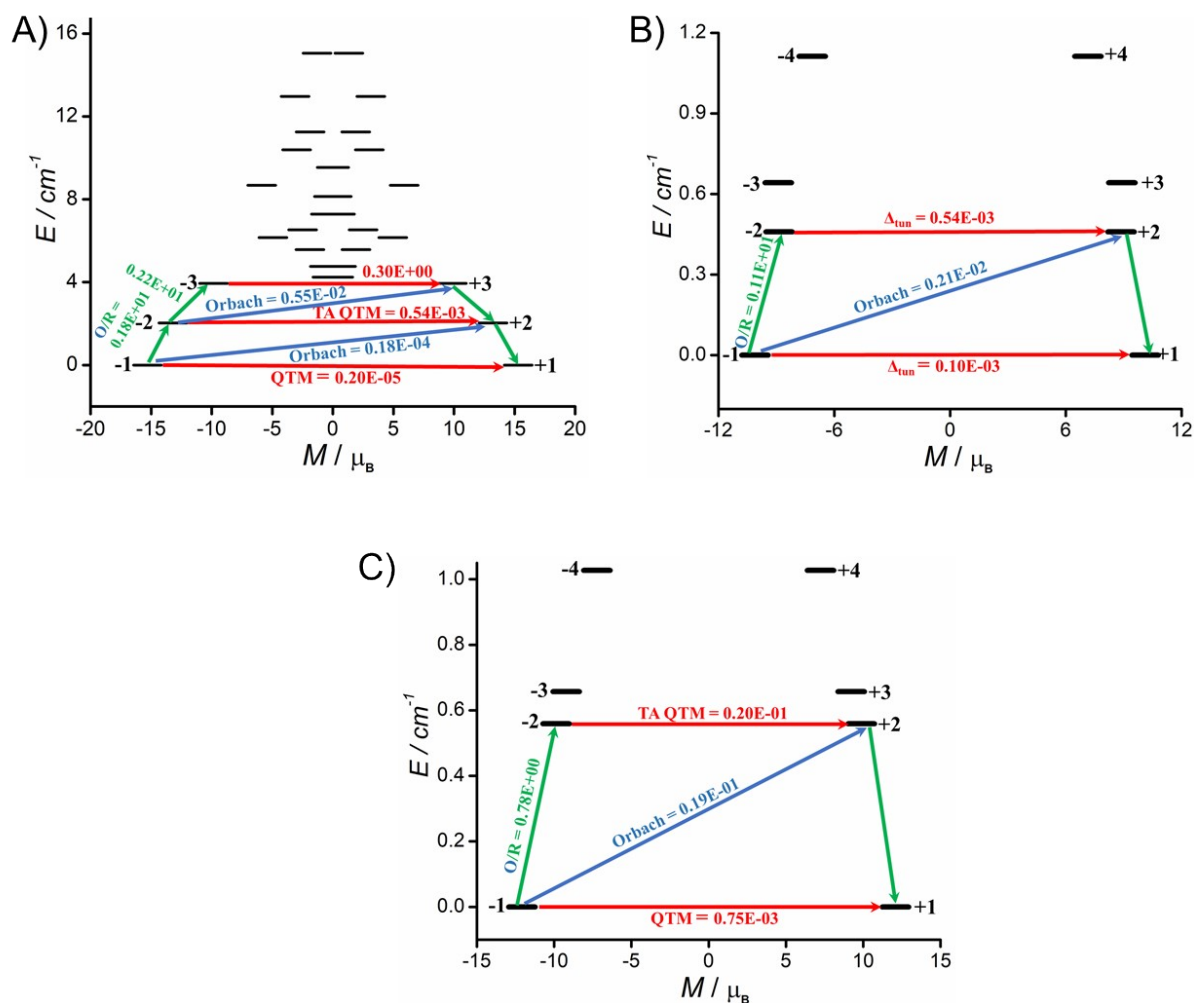

**Figure S9.** Low-lying exchange spectra (A, B and C) for complexes **4-6** respectively. Exchange states are placed on the diagram in according to their magnetic moment. Red dotted arrows/curved arrows show the tunnelling of magnetization within each doublet, while the green and blue dotted arrows show the possible relaxation through Raman/Orbach process.

## References

1. P. J. Stephens, F. J. Devlin, C. F. Chabalowski and M. J. Frisch, *J. Phys. Chem.*, 1994, **98**, 11623-11627.
2. A. Schäfer, H. Horn and R. Ahlrichs, *J. Chem. Phys.*, 1992, **97**, 2571-2577.
3. M. Frisch, G. Trucks, H. B. Schlegel, G. Scuseria, M. Robb, J. Cheeseman, G. Scalmani, V. Barone, B. Mennucci and G. Petersson, *Inc., Wallingford, CT*, 2009, **200**, 28.
